# Supplementary material for: Survival of the enveloped bacteriophage Phi6 (a surrogate for SARS-CoV-2) in evaporated saliva microdroplets deposited on glass surfaces
Source: PubMed Central journal article supplement (PMC7772334; doi:10.1038/s41598-020-79625-z), 2020-12-29
Supplement: 41598_2020_79625_MOESM4_ESM.pdf [file 41598_2020_79625_MOESM4_ESM.pdf]

**Survival of the enveloped bacteriophage Phi6 (a surrogate for SARS-CoV-2)  
in evaporated saliva microdroplets deposited on glass surfaces**

Aliza Fedorenko<sup>1</sup>, Maor Grinberg<sup>1</sup>, Tomer Orevi<sup>1</sup>, Nadav Kashtan<sup>1\*</sup>

**Supplementary Information**

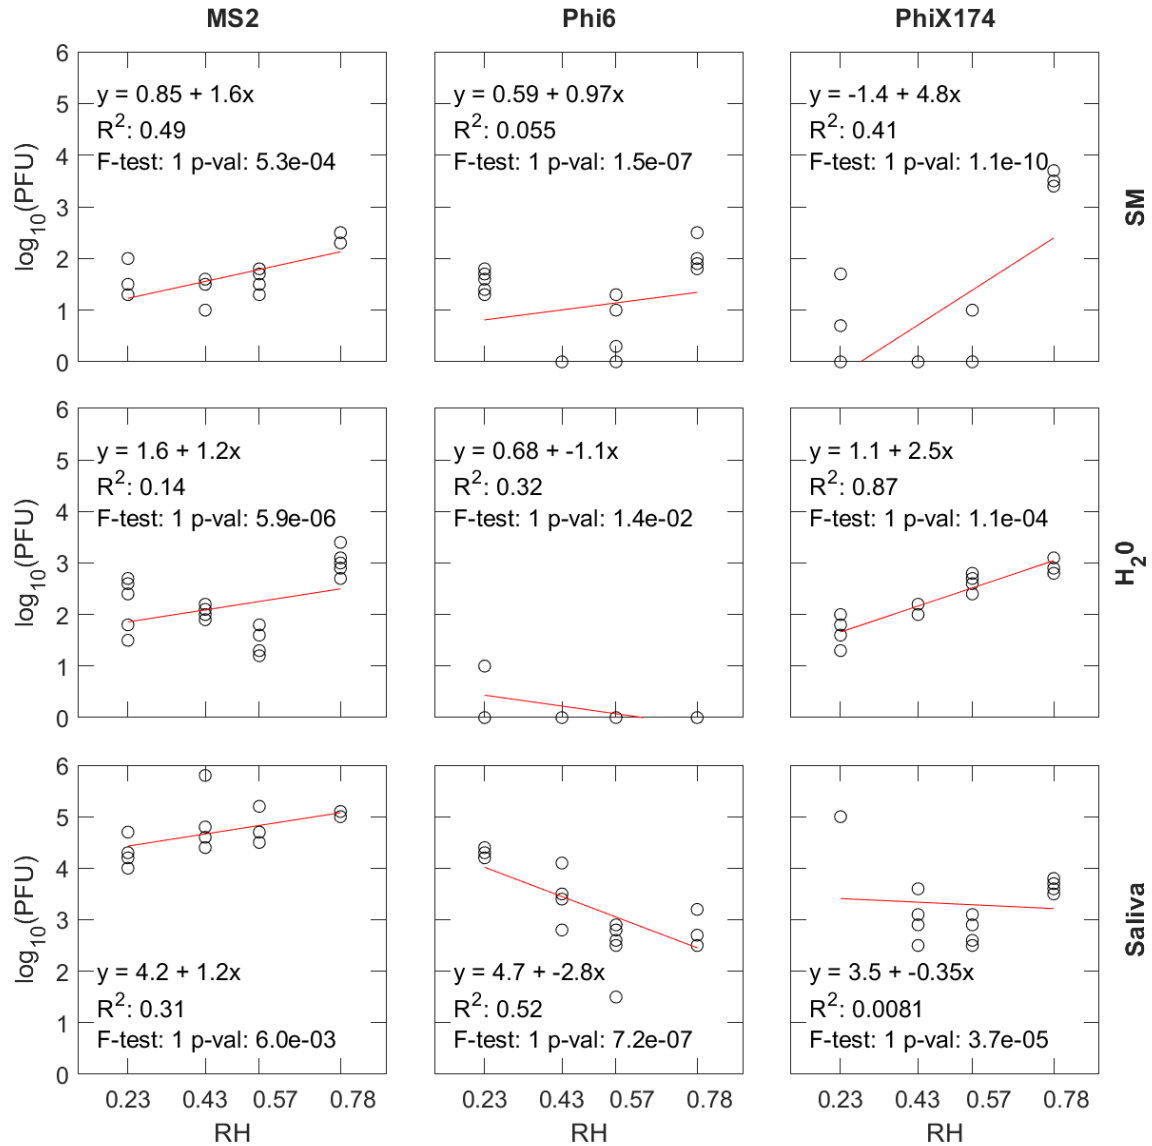

**Supp. Fig. S1** Linear regression analysis of reduction in phage viability (Log10 transformed) as a function of RH. Circles mark experimental values, regression line (red line) is shown along with its linear equation, R<sup>2</sup> values, F-statistics and P-values. Data points are same as presented in Fig. 4. Analysis was performed in MATLAB.

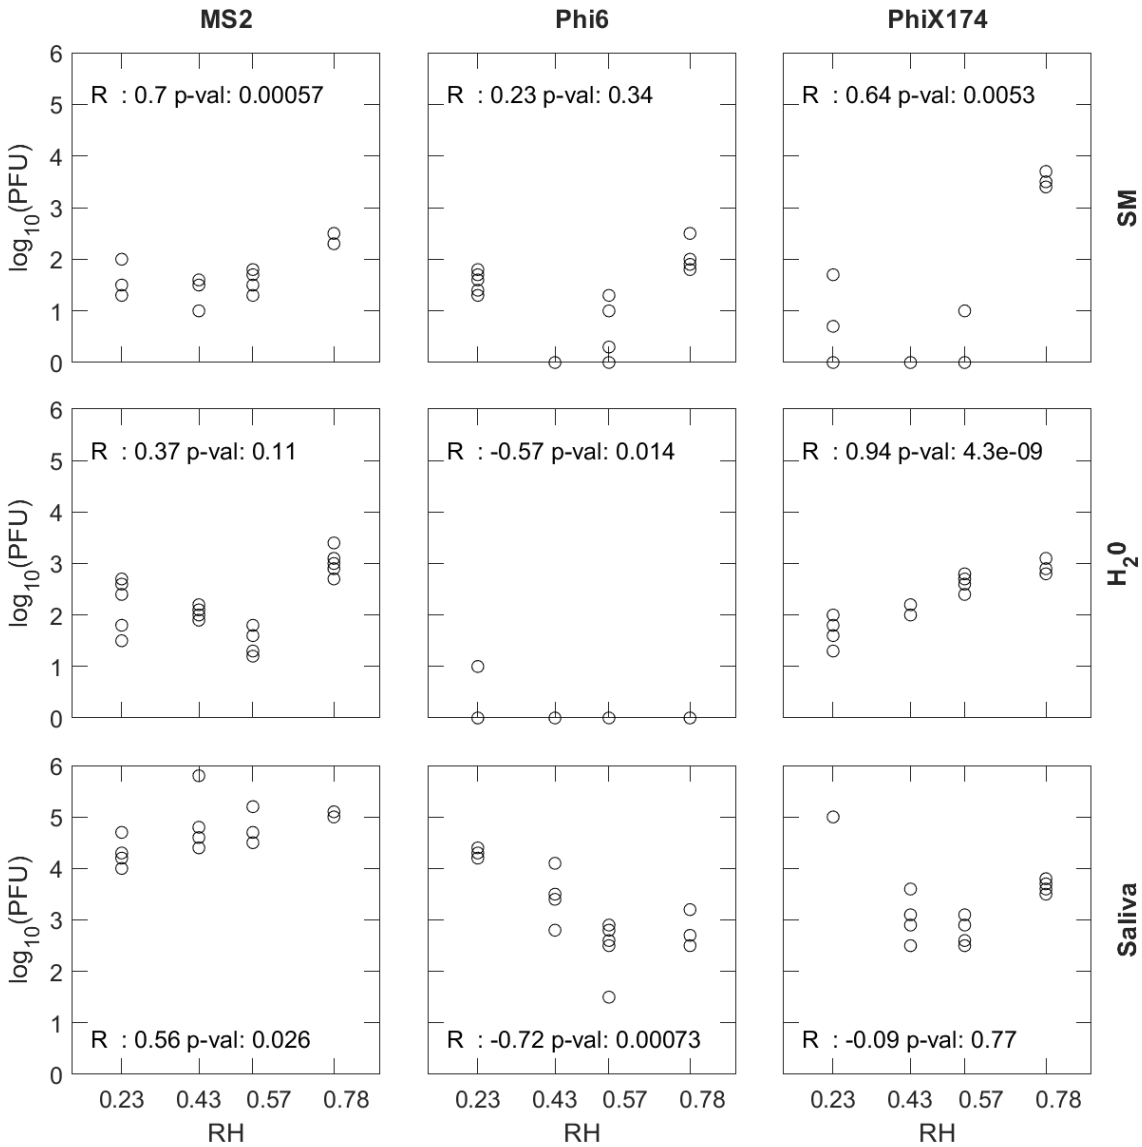

**Supp. Fig. S2** Correlation between reduction in phage viability (Log10 transformed) and RH. Circles mark experimental values. R values are Pearson correlation coefficients. Data points are same as presented in Fig. 4. Analysis was performed in MATLAB.

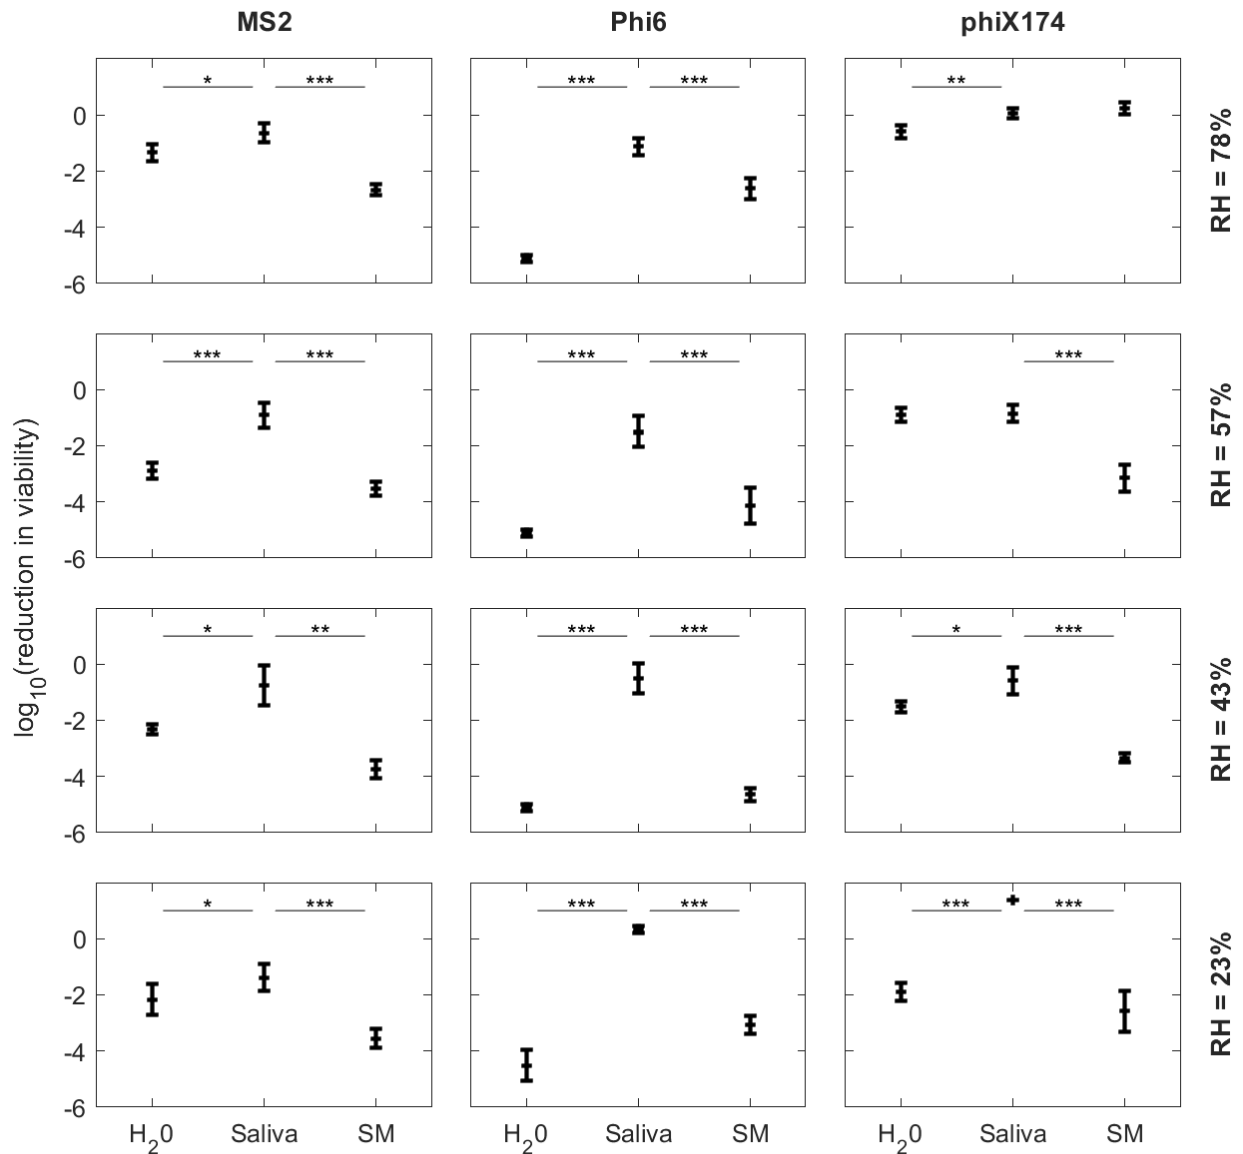

**Supp. Fig. S3** virus survival in saliva microdroplets in comparison to SM buffer and water under same RH levels. The significance was assessed by Welch t-test. Significance marked by \*, \*\*, or \*\*\*, denoting p-values of <0.05, <0.005, or <0.0005, respectively. Data points are same as presented in Fig. 4. Analysis was performed in MATLAB.
